# Supplementary material
Source: publisher figshare collection journal article supplement (https://acs.figshare.com/ndownloader/files/5783070)

## Supporting Information

### Highly Efficient $\text{B}(\text{C}_6\text{F}_5)_3$ -Catalyzed Hydrosilylation of Olefins

Michael Rubin, Todd Schwier, and Vladimir Gevorgyan\*

Department of Chemistry, University of Illinois at Chicago  
845 West Taylor Street, Chicago, Illinois 60607-7061

$^1\text{H}$  and  $^{13}\text{C}$  charts of new compound **3n** (Total number of pages: 3).

Current Data Parameters  
 NAME mr0596  
 EXPNO 1  
 PROCNO 1

F2 - Acquisition Parameters  
 Date\_ 20010813  
 Time 16.46  
 INSTRUM spect  
 PROBHD 5 mm BBO BB-1  
 PULPROG zg  
 TD 16384  
 SOLVENT CDCl3  
 NS 8  
 DS 2  
 SMH 4789.272 Hz  
 FIDRES 0.292314 Hz  
 AQ 1.7105396 sec  
 RG 32  
 DM 104.400 usec  
 DE 6.00 usec  
 TE 300.0 K  
 D1 1.00000000 sec  
 P1 5.50 usec  
 SF01 400.1342000 MHz  
 NUC1 <sup>1</sup>H  
 PL1 -3.00 dB

F2 - Processing parameters  
 SI 8192  
 SF 400.1320090 MHz  
 WDW EM  
 SSB 0  
 LB 0.10 Hz  
 GB 0  
 PC 1.00

1D NMR plot parameters  
 CX 20.00 cm  
 F1P 10.100 ppm  
 F1 4041.33 Hz  
 F2P -0.100 ppm  
 F2 -40.01 Hz  
 PPMCM 0.51000 ppm/cm  
 HZCM 204.06735 Hz/cm

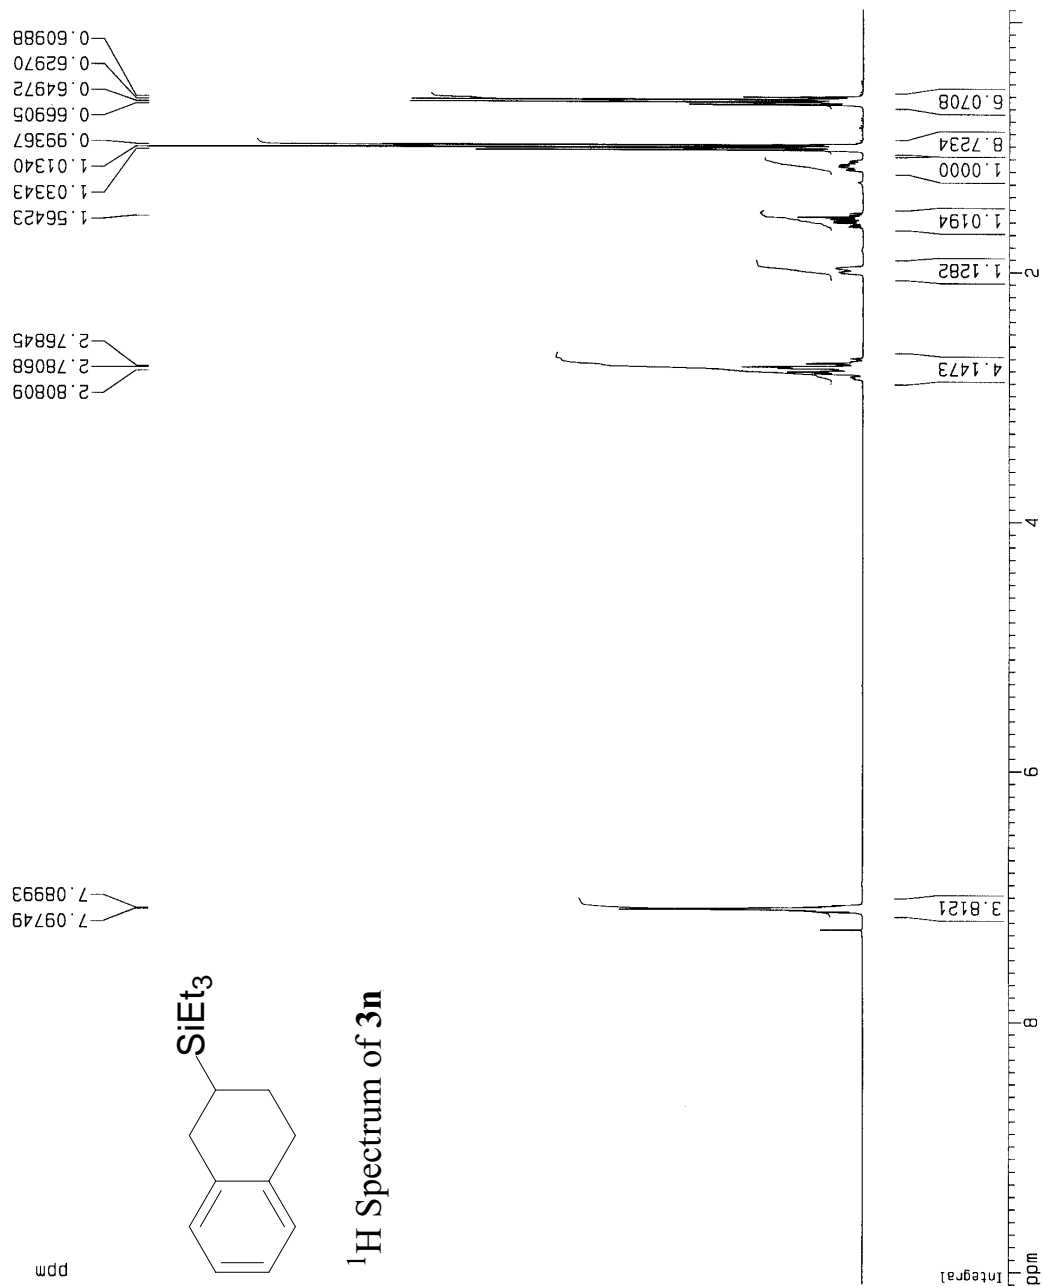

Carbon-13 standard parameters, BBO probe

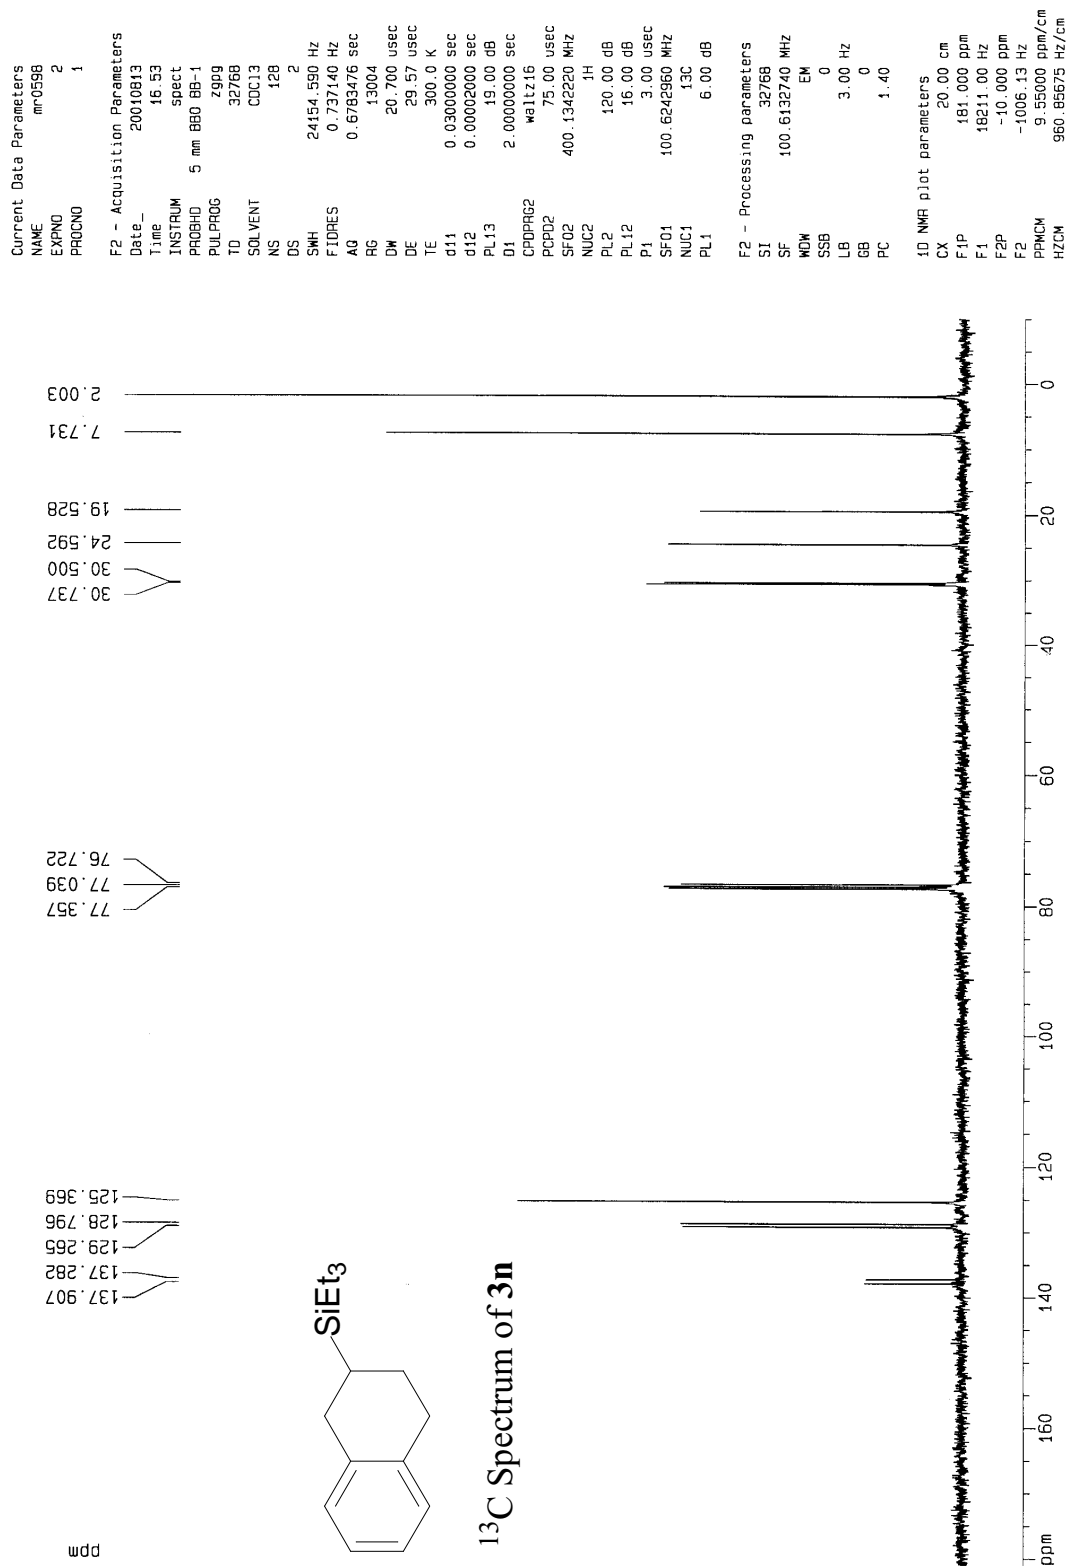

Supplement: Supplementary file 1 [file 5783070]
